# Supplementary material for: A dumbbell double nicked duplex dodecamer DNA with a PEG6 tether
Source: Royal Society of Chemistry journal article supplement (doi:10.1039/c1ob05103b), 2011-01-01
Supplement: c1ob05103b.pdf [file c1ob05103b.pdf]

## Supplementary Material

# A dumbbell double nicked duplex dodecamer DNA with PEG<sub>6</sub> tether

Karolina Hyz,<sup>a</sup> Wojciech Bocian,<sup>a,b</sup> Robert Kawęcki,<sup>b,c</sup> Elżbieta Bednarek,<sup>b</sup> Jerzy Sitkowski,<sup>a,b</sup>  
and Lech Kozerski\*<sup>a,b</sup>

<sup>a</sup> Institute of Organic Chemistry, Polish Academy of Sciences, Kasprzaka 44, 01-224 Warszawa, Poland. Fax:

+48 22 632 6681; Tel: +48 22343 2018; E-mail: lkoz@icho.edu.pl

<sup>b</sup> National Medicines Institute, Chelmska 30/34, 00-725 Warszawa, Poland

<sup>c</sup> University of Natural Sciences and Humanities, 3. Maja 54, 80-110 Siedlce, Poland

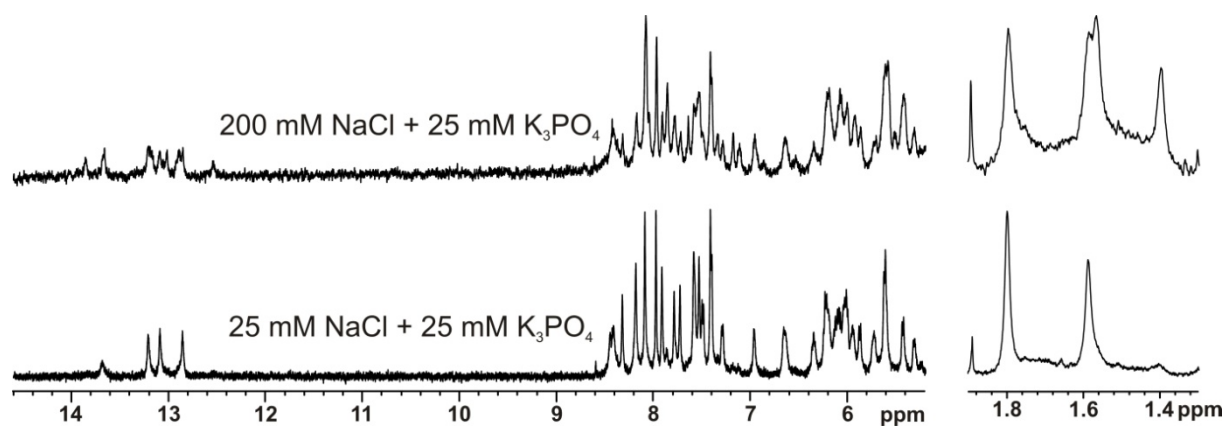

**Fig. 1S** The ionic strength dependence of equilibrium at low DNA hairpin concentration (0.25 mM) at 10° C.

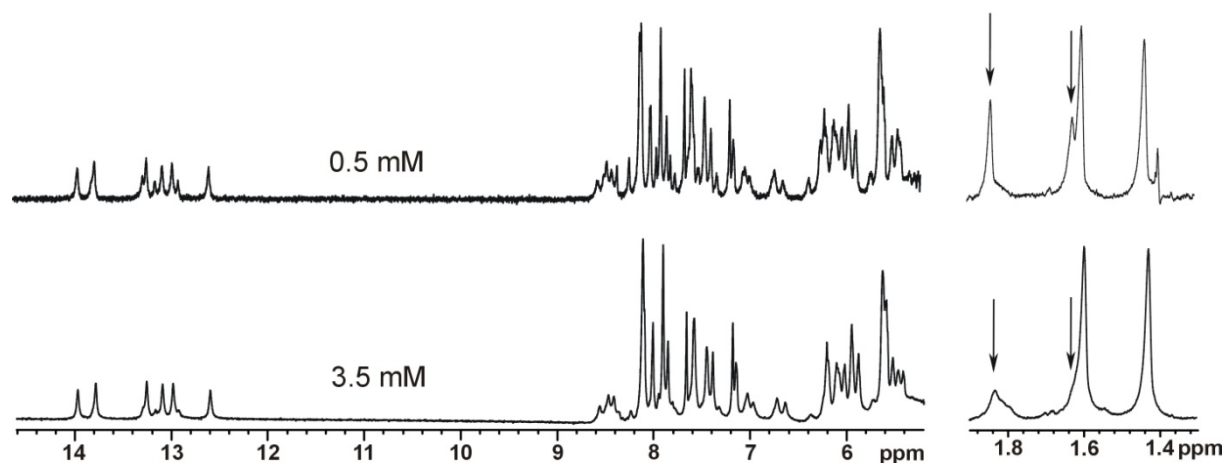

**Fig. 2S.** Hairpin concentration dependence of hairpin – dumbbell equilibrium in a 25/25 mM  $K_3PO_4/NaCl$  water buffer at 0° C. On the right side of the spectra the thymidine resonances are displayed. The arrows indicate the thymidine resonances assigned to hairpin motif.

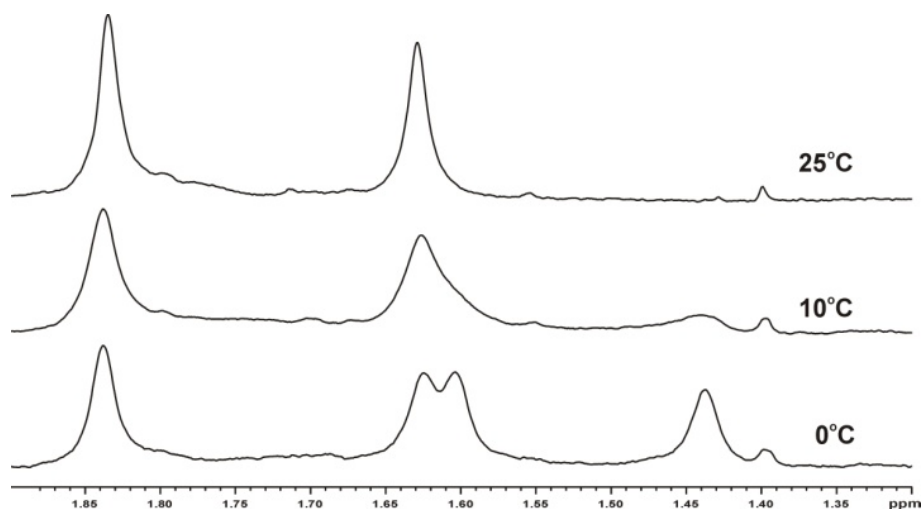

**Fig. 3S** The temperature dependence of the hairpin – dumbbell equilibrium in 0.35 mM  $H_2O$  solution and 25/25 mM  $K_3PO_4/NaCl$  buffer, pH 6.1 observed on thymidine methyl groups.

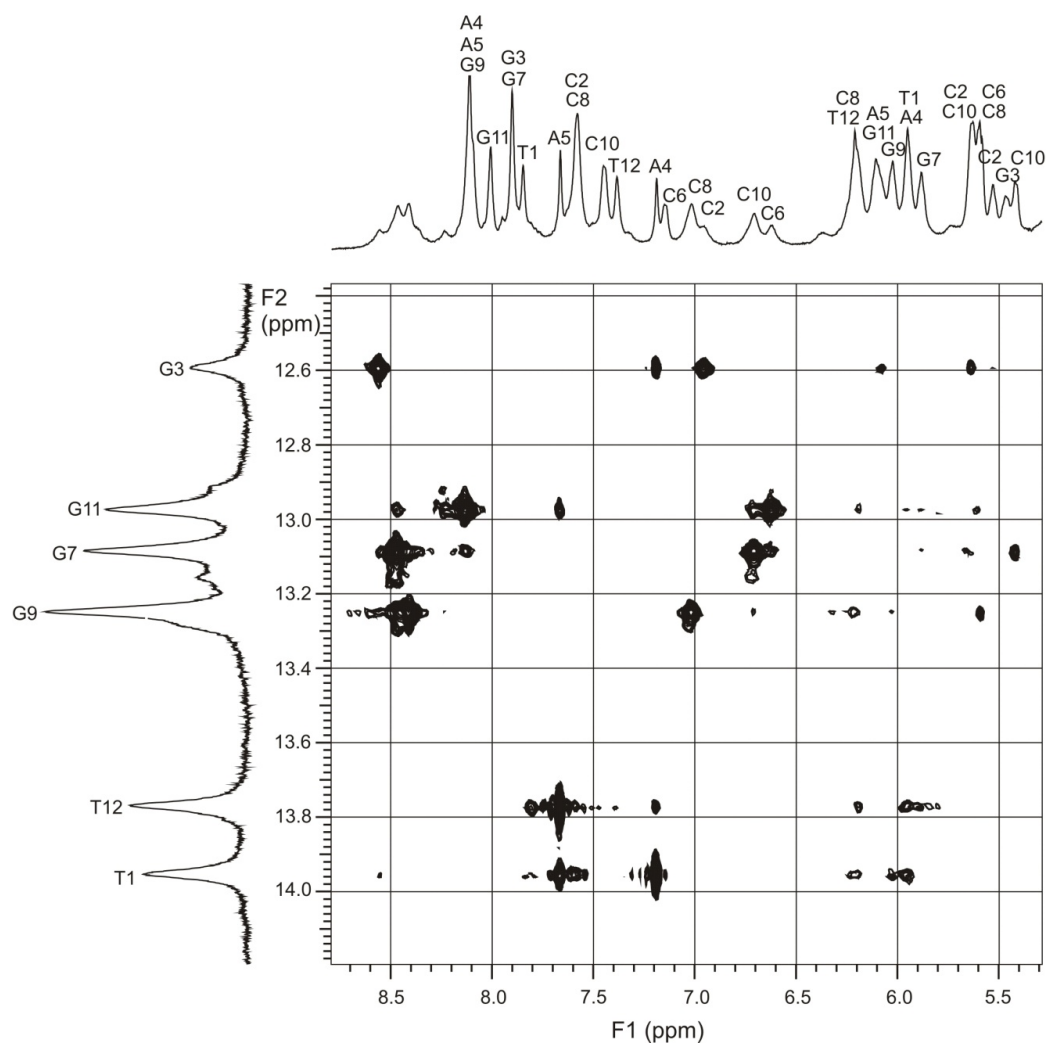

**Fig. 4S.** Imine region of NOESY spectrum of dumbbell DNA at 0°C, 3.5 mM in monomer, pH 6.1, in 25/25 mM K<sub>3</sub>PO<sub>4</sub>/NaCl buffer.

**Table 1S.** Hairpin <sup>1</sup>H chemical shifts in H<sub>2</sub>O/D<sub>2</sub>O (9:1) at 25° C, pH 6.0, in 25/25 mM K<sub>3</sub>PO<sub>4</sub>/ NaCl buffer.

| Base | H1'  | H2'  | H2'' | H3'  | H4'  | H5', H5''  | H6/8 | H2/5/Me | NH2        | NH    |
|------|------|------|------|------|------|------------|------|---------|------------|-------|
| T1   | 6.14 | na   | 2.43 | na   | na   | na         | 7.55 | 1.83    | -          | b     |
| C2   | 6.04 | na   | 2.24 | na   | na   | na         | 7.52 | 5.90    | b          | -     |
| G3   | 5.41 | na   | 2.40 | 4.88 | 4.18 | 3.92, 3.97 | 7.74 | -       | -          | b     |
| A4   | 5.34 | na   | 2.62 | 4.94 | 4.04 | na         | 8.17 | na      | -          | -     |
| A5   | 6.20 | 2.83 | 2.86 | 5.06 | 4.46 | 4.09, 4.16 | 8.32 | na      | -          | -     |
| C6   | 5.64 | 1.97 | 2.34 | 4.84 | 4.20 | na         | 7.30 | 5.34    | 6.57; 8.19 | -     |
| G7   | 5.96 | 2.64 | 2.73 | 5.02 | 4.39 | 4.09, 4.15 | 7.92 | -       | -          | 13.10 |
| C8   | 6.26 | 2.26 | 2.48 | 4.87 | 4.22 | na         | 7.59 | 5.64    | 6.90; 8.40 | -     |
| G9   | 6.02 | 2.79 | 2.86 | 4.98 | 4.35 | 3.90, 4.01 | 8.10 | -       | -          | 13.22 |
| C10  | 5.76 | 2.11 | 2.44 | 4.89 | 4.23 | na         | 7.41 | 5.45    | 6.59; 8.45 | -     |
| G11  | 6.09 | 2.70 | 2.82 | 5.05 | 4.43 | 4.11, 4.18 | 7.97 | -       | -          | 12.87 |
| T12  | 6.36 | 2.43 | 2.50 | 4.93 | 4.29 | 3.98, 4.05 | 7.43 | 1.63    | -          | b     |

- a) Data obtained in H<sub>2</sub>O buffer, pH 6.0, 2.5 mg, c = 0.35 mM, 25°C.  
Buffer solution contains 25 mM NaCl, 25 mM K<sub>3</sub>PO<sub>4</sub>·H<sub>2</sub>O and 10% of D<sub>2</sub>O.  
TSPA was added as internal reference.
- b) Broad signal not observed at 25°C.

**Table 2S.** Dumbbell <sup>1</sup>H chemical shifts in 3.5 mM H<sub>2</sub>O solution in a 25/25 mM NaCl/K<sub>3</sub>PO<sub>4</sub> buffer at 0°C, pH=6 from NOESY spectrum.

| Base | H1'  | H2'  | H2'' | H3'  | H4'  | H5', H5'' | H6/8 | H2/5/Me | NH2        | NH    |
|------|------|------|------|------|------|-----------|------|---------|------------|-------|
| T1   | 5,95 | 2,13 | 2,55 | 4,71 | 4,18 | 3,91      | 7,85 | 1,60    | -          | 13,95 |
| C2   | 5,53 | 2,00 | 2,36 | 4,84 | 4,14 | no        | 7,57 | 5,63    | 6,95; 8,56 | -     |
| G3   | 5,47 | 2,69 | 2,76 | 4,99 | 4,32 | 4,01      | 7,90 | -       | -          | 12,59 |
| A4   | 5,94 | 2,69 | 2,90 | 5,07 | 4,17 | na        | 8,11 | 7,19    | -          | -     |
| A5   | 6,08 | 2,56 | 2,84 | na   | 4,44 | na        | 8,10 | 7,66    | -          | -     |
| C6   | 5,61 | 1,82 | 2,27 | 4,80 | 4,12 | na        | 7,15 | 5,18    | 6,62; 8,13 | -     |
| G7   | 5,88 | 2,61 | 2,69 | 4,98 | 4,36 | na        | 7,90 | -       | -          | 13,09 |
| C8   | 6,21 | 2,26 | 2,46 | 4,85 | 4,20 | na        | 7,58 | 5,59    | 7,02; 8,41 | -     |
| G9   | 6,03 | 2,81 | 2,86 | 4,98 | 4,35 | 3,88      | 8,11 | -       | -          | 13,25 |
| C10  | 5,64 | 2,22 | 2,46 | 4,89 | 4,24 | na        | 7,45 | 5,42    | 6,71; 8,47 | -     |
| G11  | 6,10 | 2,73 | 2,88 | 5,06 | 4,46 | 4,19      | 8,01 | -       | -          | 12,97 |
| T12  | 6,19 | 2,36 | 2,42 | 4,96 | 4,26 | na        | 7,38 | 1,44    | -          | 13,77 |

Data obtained in H<sub>2</sub>O buffer, 25 mM NaCl, 25 mM K<sub>3</sub>PO<sub>4</sub>·H<sub>2</sub>O, 10 vol % D<sub>2</sub>O pH 6.0, c = 3.5 mM, 0° C. Chemical shifts given vs internal TSPA.

**Table 3S.** Some chosen helical parameters In computed dumbbell structure .

| Interstrand base pair | x-displacement dx (Å) | y-displacement dy (Å) | inclination η (°) | tip θ (°)   | buckle κ (°) | propeller twist Ω (°) | opening σ (°) |
|-----------------------|-----------------------|-----------------------|-------------------|-------------|--------------|-----------------------|---------------|
| G9 - C8               | -1.40±0.24            | 1.22±0.22             | 5.43±1.91         | -12.78±1.72 | 19.61±6.17   | 1.80±7.09             | 3.62±2.65     |
| C10 - G7              | -1.67±0.21            | 1.03±0.17             | 5.03±2.38         | -12.53±1.85 | 15.48±4.36   | -15.76±6.25           | -4.33±1.28    |
| G11 - C6              | -1.61±0.22            | 0.66±0.19             | -0.65±2.06        | -3.43±1.01  | 7.37±3.24    | -28.64±3.80           | 0.07±1.75     |
| T12 - A5              | -1.30±0.17            | 0.16±0.14             | -5.01±1.77        | -0.96±1.62  | -17.99±2.51  | -14.02±4.56           | 8.85±1.07     |
| T1 - A4               | -1.02±0.17            | 0.34±0.15             | -6.42±1.57        | -11.48±1.33 | -3.65±1.52   | 13.04±3.36            | 4.19±1.41     |
| C2 - G3               | -1.30±0.16            | -0.13±0.14            | -7.48±1.82        | 0.39±0.89   | -10.18±1.48  | 16.53±2.33            | -0.24±1.17    |
| G3 - C2               | -1.30±0.17            | 0.08±0.15             | -7.26±1.86        | 0.17±1.47   | 9.35±3.81    | 15.00±4.85            | 0.25±1.81     |
| A4 - T1               | -1.02±0.15            | -0.38±0.14            | -6.43±1.78        | 11.79±1.47  | 3.37±1.81    | 15.11±4.83            | 4.41±1.73     |
| A5 - T12              | -1.31±0.17            | -0.22±0.16            | -4.99±1.65        | 1.34±1.31   | 19.06±1.36   | -12.67±1.75           | 8.34±1.17     |
| C6 - G11              | -1.62±0.17            | -0.77±0.17            | -0.03±1.65        | 4.25±0.94   | -8.41±2.55   | -29.27±3.14           | -0.62±1.90    |
| G7 - C10              | -1.68±0.20            | -1.12±0.20            | 5.37±1.75         | 13.00±1.18  | -12.41±3.55  | -16.87±6.01           | -4.20±1.42    |
| C8 - G9               | -1.33±0.22            | -1.33±0.25            | 6.17±1.80         | 13.23±1.26  | -15.67±5.77  | 4.72±3.93             | 6.06±2.96     |
| mean                  | -1.38±0.16            | -0.04±0.14            | -1.35±1.61        | 0.25±0.73   | 0.50±1.12    | -4.25±1.22            | 2.20±0.49     |
| B-DNA*                | -0.71                 | 0.0                   | -5.91             | 0.0         | 0.0          | 3.72                  | -4.11         |
| A-DNA*                | -5.43                 | 0.0                   | 19.09             | 0.0         | 0.0          | 13.7                  | -4.61         |

\*canonical forms

**Table 4S.** Differences between computed dumbbell parameters and canonical form B-DNA

| Interstrand base pair | x-displacement dx (Å) | y-displacement dy (Å) | inclination η (°) | tip θ (°) | buckle κ (°) | propeller twist Ω (°) | opening σ (°) |
|-----------------------|-----------------------|-----------------------|-------------------|-----------|--------------|-----------------------|---------------|
| G9 - C8               | 0,69                  | -1,22                 | -11,34            | 12,78     | -19,61       | 1,92                  | -7,73         |
| C10 - G7              | 0,96                  | -1,03                 | -10,94            | 12,53     | -15,48       | 19,48                 | 0,22          |
| G11 - C6              | 0,23                  | -0,70                 | -0,71             | 3,68      | -6,88        | 24,39                 | 2,13          |
| T12 - A5              | 0,59                  | -0,16                 | -0,90             | 0,96      | 17,99        | 17,74                 | -12,96        |
| T1 - A4               | 0,31                  | -0,34                 | 0,51              | 11,48     | 3,65         | -9,32                 | -8,30         |
| C2 - G3               | 0,59                  | 0,13                  | 1,57              | -0,39     | 10,18        | -12,81                | -3,87         |
| G3 - C2               | 0,59                  | -0,08                 | 1,35              | -0,17     | -9,35        | -11,28                | -4,36         |
| A4 - T1               | 0,31                  | 0,38                  | 0,52              | -11,79    | -3,37        | -11,39                | -8,52         |
| A5 - T12              | 0,60                  | 0,22                  | -0,92             | -1,34     | -19,06       | 16,39                 | -12,45        |
| C6 - G11              | 0,91                  | 0,77                  | -5,88             | -4,25     | 8,41         | 32,99                 | -3,49         |
| G7 - C10              | 0,97                  | 1,12                  | -11,28            | -13,00    | 12,41        | 20,59                 | 0,09          |
| C8 - G9               | 0,62                  | 1,33                  | -12,08            | -13,23    | 15,67        | -1,00                 | -10,17        |

**Table 5S.** Some chosen helical parameters in computed dumbbell structure

| Sequence base pair | shift Dx (Å) | slide Dy (Å) | rise Dz (Å) | tilt $\tau$ (°) | roll $\rho$ (°) | twist $\Omega$ (°) |
|--------------------|--------------|--------------|-------------|-----------------|-----------------|--------------------|
| G9 - C10           | -0.44±0.16   | -0.88±0.19   | 3.56±0.22   | 5.03±2.06       | 6.05±4.21       | 29.34±1.47         |
| C10 - G11          | 0.17±0.20    | -1.25±0.25   | 3.41±0.17   | -2.90±1.07      | 28.59±4.13      | 28.52±2.52         |
| G11 - T12          | 0.44±0.08    | -1.69±0.17   | 3.85±0.14   | -0.09±1.09      | 7.68±3.06       | 31.73±1.02         |
| T12 - T1           | 0.74±0.11    | -0.64±0.10   | 3.38±0.04   | 4.20±0.40       | -23.54±2.81     | 36.43±1.42         |
| T1 - C2            | -0.26±0.13   | -1.91±0.07   | 3.39±0.08   | -0.75±0.59      | 22.49±2.26      | 22.77±1.08         |
| C2 - G3            | 0.01±0.17    | -0.70±0.17   | 2.81±0.11   | 0.33±1.58       | -0.08±4.37      | 36.32±2.06         |
| G3 - A4            | 0.25±0.12    | -1.86±0.18   | 3.38±0.12   | 0.33±1.05       | 21.66±3.53      | 22.33±1.12         |
| A4 - A5            | -0.72±0.11   | -0.68±0.13   | 3.38±0.06   | -4.15±0.70      | -24.04±1.65     | 36.28±1.01         |
| A5 - C6            | -0.46±0.09   | -1.78±0.13   | 3.90±0.11   | 0.19±0.47       | 8.01±1.33       | 32.38±0.73         |
| C6 - G7            | -0.17±0.17   | -1.15±0.26   | 3.33±0.10   | 1.21±0.84       | 28.12±2.22      | 27.42±2.18         |
| G7 - C8            | 0.59±0.15    | -0.84±0.18   | 3.57±0.17   | -4.72±1.41      | 6.53±2.75       | 28.74±1.07         |
| mean               | 0.01±0.03    | -1.22±0.06   | 3.45±0.03   | -0.12±0.25      | 7.41±0.64       | 30.21±0.51         |
| B-DNA*             | 0.0          | 0.0          | 3.38        | 0.0             | 0.0             | 36.0               |

\* canonical form

**Table 6S.** Differences between computed dumbbell parameters and canonical form B-DNA

| Sequence base pair | shift Dx (Å) | slide Dy (Å) | rise Dz (Å) | tilt $\tau$ (°) | roll $\rho$ (°) | twist $\Omega$ (°) |
|--------------------|--------------|--------------|-------------|-----------------|-----------------|--------------------|
| G9 - C10           | 0,44         | 0,88         | -0,18       | -5,03           | -6,05           | 6,66               |
| C10 - G11          | -0,17        | 1,25         | -0,03       | 2,90            | -28,59          | 7,48               |
| G11 - T12          | -0,44        | 1,69         | -0,47       | 0,09            | -7,68           | 4,27               |
| T12 - T1           | -0,74        | 0,64         | 0,00        | -4,20           | 23,54           | -0,43              |
| T1 - C2            | 0,26         | 1,91         | -0,01       | 0,75            | -22,49          | 13,23              |
| C2 - G3            | -0,01        | 0,70         | 0,57        | -0,33           | 0,08            | -0,32              |
| G3 - A4            | -0,25        | 1,86         | 0,00        | -0,33           | -21,66          | 13,67              |
| A4 - A5            | 0,72         | 0,68         | 0,00        | 4,15            | 24,04           | -0,28              |
| A5 - C6            | 0,46         | 1,78         | -0,52       | -0,19           | -8,01           | 3,62               |
| C6 - G7            | 0,17         | 1,15         | 0,05        | -1,21           | -28,12          | 8,58               |
| G7 - C8            | -0,59        | 0,84         | -0,19       | 4,72            | -6,53           | 7,26               |

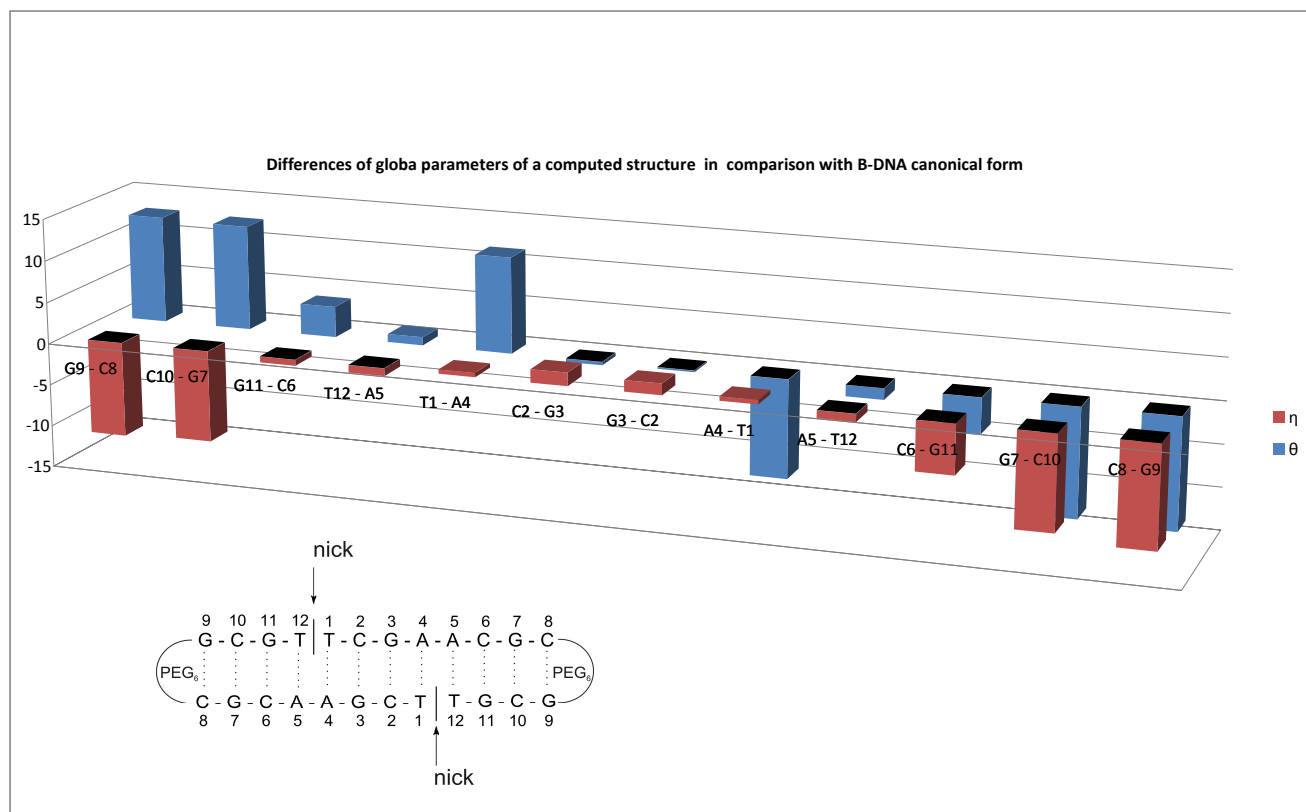

**Fig. 5S** Graphical presentation of differences of some global parameters in computed structure from simulating annealing in comparison with canonical B-DNA form.

**Table 7S.** Selected helical parameters in the Molecular Dynamics calculated dumbbell structure (no constraints)

| base pair | x-displacement dx (Å) | y-displacement dy (Å) | inclination $\eta$ (°) | tip $\theta$ (°) | buckle $\kappa$ (°) | propeller twist $\Omega$ (°) | opening ( $\sigma$ ) (°) |
|-----------|-----------------------|-----------------------|------------------------|------------------|---------------------|------------------------------|--------------------------|
| G9 - C8   | -1,41±0,28            | 0,13±0,18             | 6,50±2,07              | -0,63±2,34       | -10,55±4,95         | 1,14±5,05                    | 1,50±1,01                |
| C10 - G7  | -1,54±0,23            | 0,07±0,19             | 5,06±2,64              | -2,24±2,93       | -0,98±4,97          | -9,04±4,35                   | -0,16±1,22               |
| G11 - C6  | -1,39±0,25            | 0,15±0,17             | 4,36±2,67              | 1,42±3,16        | -4,46±3,76          | -14,02±7,80                  | 1,97±1,08                |
| T12 - A5  | -1,53±0,25            | -0,12±0,22            | 3,91±3,10              | 0,66±2,76        | -9,19±4,42          | -21,22±3,26                  | 1,96±2,04                |
| T1 - A4   | -1,41±0,26            | -0,38±0,36            | 8,56±5,43              | 1,36±3,61        | -7,78±6,01          | -16,69±6,36                  | 3,88±1,27                |
| C2 - G3   | -1,33±0,26            | -0,17±0,24            | 12,42±7,21             | -2,43±1,35       | -7,76±3,02          | -0,67±3,52                   | 1,69±0,69                |
| G3 - C2   | -1,30±0,21            | 0,14±0,14             | 12,00±6,44             | 3,62±1,53        | 4,53±3,27           | -2,22±4,37                   | 1,09±1,40                |
| A4 - T1   | -1,43±0,23            | 0,39±0,27             | 8,46±5,16              | 0,36±2,42        | 7,18±4,56           | -15,49±5,28                  | 4,60±2,61                |
| A5 - T12  | -1,58±0,21            | 0,10±0,11             | 3,85±3,08              | 0,95±2,67        | 9,35±3,45           | -17,80±5,13                  | 1,71±0,71                |
| C6 - G11  | -1,56±0,18            | -0,14±0,08            | 4,34±3,20              | -0,62±2,62       | 4,06±4,14           | -13,86±6,46                  | 1,24±1,15                |
| G7 - C10  | -1,57±0,17            | -0,08±0,19            | 5,20±2,51              | 2,24±1,50        | 0,97±6,55           | -7,49±5,80                   | 0,03±1,59                |
| C8 - G9   | -1,52±0,16            | -0,12±0,16            | 6,29±1,88              | 1,06±1,97        | 11,34±6,11          | -0,37±4,95                   | 1,20±1,06                |
| average   | -1,46±0,20            | 0,00±0,10             | 6,75±3,13              | 0,48±1,03        | -0,27±1,16          | -9,81±0,95                   | 1,73±0,39                |
| B-DNA*    | -0,71                 | 0,00                  | -5,91                  | 0,00             | 0,00                | 3,72                         | -4,11                    |
| A-DNA*    | -5,43                 | 0,00                  | 19,09                  | 0,00             | 0,00                | 13,70                        | -4,61                    |

\*canonical forms

**Table 8S.** Differences in values of selected helical parameters in the calculated dumbbell structure (no constraints) and canonical B-DNA; In brackets are shown discrepancies between dx differences in both dumbbell structures.

| base pair | x-<br>displacement<br>dx (Å) | y-<br>displacement<br>dy (Å) | inclination<br>$\eta$ (°) | tip<br>$\theta$ (°) | buckle<br>$\kappa$ (°) | propeller<br>twist $\Omega$ (°) | opening<br>$\sigma$ (°) |
|-----------|------------------------------|------------------------------|---------------------------|---------------------|------------------------|---------------------------------|-------------------------|
| G9 - C8   | 0,70 (0,01)                  | -0,13                        | -12,41                    | 0,63                | 10,55                  | 2,58                            | -5,61                   |
| C10 - G7  | 0,83 (-0,13)                 | -0,07                        | -10,97                    | 2,24                | 0,98                   | 12,76                           | -3,95                   |
| G11 - C6  | -0,07 (-0,30)                | -0,15                        | 2,39                      | -0,94               | 4,19                   | 4,21                            | -0,24                   |
| T12 - A5  | 0,82 (0,23)                  | 0,12                         | -9,82                     | -0,66               | 9,19                   | 24,94                           | -6,07                   |
| T1 - A4   | 0,70 (0,39)                  | 0,38                         | -14,47                    | -1,36               | 7,78                   | 20,41                           | -7,99                   |
| C2 - G3   | 0,62 (0,03)                  | 0,17                         | -18,33                    | 2,43                | 7,76                   | 4,39                            | -5,80                   |
| G3 - C2   | 0,59 (0,00)                  | -0,14                        | -17,91                    | -3,62               | -4,53                  | 5,94                            | -5,20                   |
| A4 - T1   | 0,72 (0,41)                  | -0,39                        | -14,37                    | -0,36               | -7,18                  | 19,21                           | -8,71                   |
| A5 - T12  | 0,87 (0,27)                  | -0,10                        | -9,76                     | -0,95               | -9,35                  | 21,52                           | -5,82                   |
| C6 - G11  | 0,85 (-0,06)                 | 0,14                         | -10,25                    | 0,62                | -4,06                  | 17,58                           | -5,35                   |
| G7 - C10  | 0,86 (-0,11)                 | 0,08                         | -11,11                    | -2,24               | -0,97                  | 11,21                           | -4,14                   |
| C8 - G9   | 0,81 (0,19)                  | 0,12                         | -12,20                    | -1,06               | -11,34                 | 4,09                            | -5,31                   |
